# Supplementary material for: G3BP1 binds to guanine quadruplexes in mRNAs to modulate their stabilities
Source: PubMed Central journal article supplement — Nucleic Acids Res. 2021 Oct 6;49(19):11323–36. doi: 10.1093/nar/gkab873 (PMC8565330; doi:10.1093/nar/gkab873), 2021-10-06
Supplement: gkab873_supplemental_file.pdf [file gkab873_supplemental_file.pdf]

## Supplementary Materials

for

### “G3BP1 Binds to Guanine Quadruplexes in mRNAs to Modulate Their Stabilities”

Xiaomei He, Jun Yuan and Yinsheng Wang\*

Department of Chemistry, University of California Riverside, CA 92521-0403, USA

\*To whom correspondence should be addressed: yinsheng.wang@ucr.edu

#### Table of Contents

|                                                                                                                                                                                                                                                                                                                                |              |
|--------------------------------------------------------------------------------------------------------------------------------------------------------------------------------------------------------------------------------------------------------------------------------------------------------------------------------|--------------|
| <b>Table S1.</b> Summary of overlapping percentages between eCLIP-seq data and rG4-seq data (GSE77282_KPDS_hits)                                                                                                                                                                                                               | <b>S3-S9</b> |
| <b>Table S2.</b> Summary of previously published rG4 binding proteins                                                                                                                                                                                                                                                          | <b>S10</b>   |
| <b>Table S3.</b> Oligonucleotides used in this study.                                                                                                                                                                                                                                                                          | <b>S11</b>   |
| <b>Figure S1.</b> Integrative Genomics Viewer (IGV) plots showing representative comparison results of rG4-seq data with AKAP1 eCLIP-seq data (A-B) and MATR3 eCLIP-seq data (C-D).                                                                                                                                            | <b>S12</b>   |
| <b>Figure S2.</b> Overlap of known rG4-binding proteins between RNA-binding proteins identified in this study and previously published rG4-binding proteins.                                                                                                                                                                   | <b>S13</b>   |
| <b>Figure S3.</b> Integrative Genomics Viewer (IGV) plots showing putative G4 forming sequences in the overlapping regions between G3BP1 eCLIP-seq peaks and rG4-seq peaks. Representative overlapping regions located in the mRNAs of (A) <i>LRP5</i> and (B) <i>FADS2</i> genes.                                             | <b>S14</b>   |
| <b>Figure S4.</b> SDS-PAGE gel of GST-G3BP1 protein and its four truncated variants.                                                                                                                                                                                                                                           | <b>S15</b>   |
| <b>Figure S5.</b> Circular dichroism (CD) spectra of PITX1 rG4 (A), NRAS rG4 (B), PITX1 rG4 in the presence of G3BP1 protein (C), and G3BP1 protein only (D). The CD spectrum of rG4 in the G3BP1-rG4 complex (C) was obtained by subtracting the CD spectrum of G3BP1 protein (D) from CD spectrum of the mixture (no shown). | <b>S16</b>   |
| <b>Figure S6.</b> EMSA for monitoring the G3BP1-rG4 interaction with increasing concentrations of G3BP1 (A), and with a fixed concentration of G3BP1 together with increasing concentrations of PDS (B).                                                                                                                       | <b>S17</b>   |

|                                                                                                                                                                                                                                                                 |                |
|-----------------------------------------------------------------------------------------------------------------------------------------------------------------------------------------------------------------------------------------------------------------|----------------|
| <b>Figure S7.</b> Representative Sanger sequencing results showing CRISPR-induced indel mutations of <i>G3BP1</i> gene in HEK293T cells (A) and HeLa cells (B) (i.e., <i>G3BP1</i> <sup>-/-</sup> cells).                                                       | <b>S18</b>     |
| <b>Figure S8.</b> RT-qPCR and Western blot results showing the mRNA and protein levels of Flag-PITX1 in HEK293T and the isogenic <i>G3BP1</i> <sup>-/-</sup> cells transfected with Flag-PITX1-WT and Flag-PITX1-3Qm plasmids.                                  | <b>S19</b>     |
| <b>Figure S9.</b> seCLIP-seq peaks annotation for “Ctrl” dataset (A) and “PDS” dataset (B).                                                                                                                                                                     | <b>S20</b>     |
| <b>Figure S10.</b> IGV plots showing the comparison of G3BP1 peaks from seCLIP-seq Replicate-1 (A) and Replicate-2 (B) around the rG4- forming sequences located in the 3'-UTR of <i>PITX1</i> gene between control (Ctrl) and PDS-treated (PDS) cells.         | <b>S21</b>     |
| <b>Figure S11.</b> IGV plots showing the comparison between “Ctrl” and “PDS” peaks from seCLIP-seq Replicate-1 (A) and Replicate-2 (B) around the rG4-forming sequence located at 5'-UTR of <i>NRAS</i> gene.                                                   | <b>S22</b>     |
| <b>Figure S12.</b> IGV plots showing the comparison between “Ctrl” and “PDS” peaks from seCLIP-seq Replicate-2 around the rG4-forming sequences located at 5'- and 3'-UTR of <i>KHSRP</i> gene.                                                                 | <b>S23</b>     |
| <b>Figure S13.</b> IGV plots showing the comparison between “Ctrl” and “PDS” peaks from seCLIP-seq Replicate-1 (A) and Replicate-2 (B) around the rG4-forming sequences located at 3'-UTR of <i>ACTR2</i> gene.                                                 | <b>S24</b>     |
| <b>Figure S14.</b> RT-qPCR results showing the half-lives of (A) KHSRP and (B) ACTR2 mRNAs in 293T cell, the isogenic <i>G3BP1</i> <sup>-/-</sup> cells, and PDS-treated 293T cells.                                                                            | <b>S25</b>     |
| <b>Figure S15.</b> qPCR and Western blot results showing the mRNA and protein levels of <i>PITX1</i> , <i>KHSRP</i> and <i>ACTR2</i> genes in HeLa cells, G3BP1-depleted HeLa cells, HeLa cells without or with PDS treatment.                                  | <b>S26</b>     |
| <b>Figure S16.</b> mRNA expression levels of PITX1 (A), KHSRP (B) and ACTR2 (C) in HepG2 and K562 cells. Base mean is the mean of normalized counts of replicates (n = 2)                                                                                       | <b>S27</b>     |
| <b>Figure S17.</b> A comparison of human G3BP1, HNRNPA1 and HNRNPA2B1 proteins. (A) Schematic diagrams depicting the domain structures of the three proteins. IDR, intrinsically disordered region; RRM, RNA recognition motif; RG-rich, arginine-glycine rich. | <b>S28</b>     |
| <b>References</b>                                                                                                                                                                                                                                               | <b>S29-S30</b> |

**Table S1.** Summary of overlapping percentages between eCLIP-seq data (1) and rG4-seq data (GSE77282\_KPDS\_hits) (2). Some known rG4 binding proteins are highlighted in blue.

| File accessions | Experiment Targets | Cell Lines | Total Peaks | Overlapping Peaks ( $P < 0.05$ ) | Overlapping Percentages |
|-----------------|--------------------|------------|-------------|----------------------------------|-------------------------|
| ENCFF575BCP     | AKAP1              | HepG2      | 5878        | 4047                             | 68.9%                   |
| ENCFF727XDH     | DDX55              | K562       | 1114        | 749                              | 67.2%                   |
| ENCFF814JGE     | UPF1               | K562       | 13450       | 9015                             | 67.0%                   |
| ENCFF153CMF     | CPEB4              | K562       | 194         | 130                              | 67.0%                   |
| ENCFF242FDW     | UPF1               | HepG2      | 9600        | 6359                             | 66.2%                   |
| ENCFF545FMX     | NPM1               | K562       | 41          | 26                               | 63.4%                   |
| ENCFF901ABJ     | SUPV3L1            | K562       | 40          | 25                               | 62.5%                   |
| ENCFF846JEW     | DDX6               | K562       | 1992        | 1217                             | 61.1%                   |
| ENCFF822NMS     | DDX55              | HepG2      | 1746        | 1028                             | 58.9%                   |
| ENCFF982RHC     | RBM15              | HepG2      | 1519        | 882                              | 58.1%                   |
| ENCFF975HKC     | PABPN1             | HepG2      | 3955        | 2296                             | 58.1%                   |
| ENCFF368MXJ     | FAM120A            | K562       | 5681        | 3249                             | 57.2%                   |
| ENCFF103XLC     | GRSF1              | HepG2      | 994         | 568                              | 57.1%                   |
| ENCFF470JIH     | PUS1               | K562       | 7           | 4                                | 57.1%                   |
| ENCFF241KPE     | SDAD1              | K562       | 43          | 24                               | 55.8%                   |
| ENCFF982GEG     | ZRANB2             | K562       | 368         | 202                              | 54.9%                   |
| ENCFF736YDH     | APOBEC3C           | K562       | 990         | 541                              | 54.7%                   |
| ENCFF358QSY     | WDR43              | K562       | 135         | 73                               | 54.1%                   |
| ENCFF756RYJ     | AARS               | K562       | 36          | 19                               | 52.8%                   |
| ENCFF327WXM     | ZC3H11A            | K562       | 1245        | 656                              | 52.7%                   |
| ENCFF565BTR     | METAP2             | K562       | 3067        | 1616                             | 52.7%                   |
| ENCFF431FMQ     | PCBP1              | K562       | 2194        | 1152                             | 52.5%                   |
| ENCFF956PEQ     | PABPC4             | K562       | 5915        | 3051                             | 51.6%                   |
| ENCFF481RZR     | NCBP2              | K562       | 412         | 209                              | 50.7%                   |
| ENCFF367VYJ     | DDX42              | K562       | 107         | 54                               | 50.5%                   |
| ENCFF700XBC     | FMR1               | K562       | 3072        | 1549                             | 50.4%                   |
| ENCFF363IJZ     | FXR2               | K562       | 3994        | 2013                             | 50.4%                   |
| ENCFF263BIJ     | LARP4              | HepG2      | 5679        | 2846                             | 50.1%                   |
| ENCFF788UFQ     | SRSF1              | K562       | 2155        | 1074                             | 49.8%                   |
| ENCFF637JMJ     | LSM11              | HepG2      | 2429        | 1196                             | 49.2%                   |
| ENCFF963CVD     | G3BP1              | HepG2      | 6541        | 3210                             | 49.1%                   |
| ENCFF758EWI     | SUPV3L1            | HepG2      | 214         | 105                              | 49.1%                   |
| ENCFF108TOJ     | PCBP1              | HepG2      | 960         | 467                              | 48.7%                   |

| <b>File accessions</b> | <b>Experiment Targets</b> | <b>Cell Lines</b> | <b>Total Peaks</b> | <b>Overlapping Peaks (<math>P &lt; 0.05</math>)</b> | <b>Overlapping Percentages</b> |
|------------------------|---------------------------|-------------------|--------------------|-----------------------------------------------------|--------------------------------|
| ENCFF190WAS            | EFTUD2                    | K562              | 5635               | 2733                                                | 48.5%                          |
| ENCFF431WWR            | WDR43                     | HepG2             | 196                | 95                                                  | 48.5%                          |
| ENCFF324PNB            | SSB                       | K562              | 163                | 79                                                  | 48.5%                          |
| ENCFF261SMW            | DDX6                      | HepG2             | 548                | 265                                                 | 48.4%                          |
| ENCFF969AOQ            | PUM1                      | K562              | 2620               | 1265                                                | 48.3%                          |
| ENCFF097FBP            | SF3B4                     | HepG2             | 5843               | 2814                                                | 48.2%                          |
| ENCFF527BMM            | RBM15                     | K562              | 9282               | 4453                                                | 48.0%                          |
| ENCFF640DDA            | TIA1                      | HepG2             | 1704               | 817                                                 | 48.0%                          |
| ENCFF017IRY            | EFTUD2                    | HepG2             | 7850               | 3756                                                | 47.9%                          |
| ENCFF530MIN            | SRSF1                     | HepG2             | 1781               | 838                                                 | 47.1%                          |
| ENCFF055TAZ            | ZC3H11A                   | HepG2             | 1156               | 543                                                 | 47.0%                          |
| ENCFF310NDD            | FXR1                      | K562              | 1376               | 642                                                 | 46.7%                          |
| ENCFF727HMM            | SERBP1                    | K562              | 140                | 65                                                  | 46.4%                          |
| ENCFF977MKB            | IGF2BP2                   | K562              | 3819               | 1771                                                | 46.4%                          |
| ENCFF331VCF            | SND1                      | K562              | 4118               | 1907                                                | 46.3%                          |
| ENCFF004IIT            | TRA2A                     | K562              | 1731               | 801                                                 | 46.3%                          |
| ENCFF710LWM            | SF3A3                     | HepG2             | 2524               | 1154                                                | 45.7%                          |
| ENCFF449ZHX            | SRSF7                     | K562              | 479                | 218                                                 | 45.5%                          |
| ENCFF834BGX            | RPS3                      | K562              | 2393               | 1089                                                | 45.5%                          |
| ENCFF080PGT            | BUD13                     | HepG2             | 4244               | 1930                                                | 45.5%                          |
| ENCFF598NYT            | FUBP3                     | HepG2             | 2787               | 1262                                                | 45.3%                          |
| ENCFF400KYS            | AQR                       | K562              | 25937              | 11728                                               | 45.2%                          |
| ENCFF767LWE            | PUM2                      | K562              | 5661               | 2555                                                | 45.1%                          |
| ENCFF565RQI            | SSB                       | HepG2             | 91                 | 41                                                  | 45.1%                          |
| ENCFF540UOQ            | LIN28B                    | K562              | 6778               | 3050                                                | 45.0%                          |
| ENCFF207UUG            | ZC3H8                     | K562              | 258                | 116                                                 | 45.0%                          |
| ENCFF851FUY            | XRN2                      | K562              | 1510               | 678                                                 | 44.9%                          |
| ENCFF187VMX            | SF3B4                     | K562              | 10684              | 4770                                                | 44.7%                          |
| ENCFF351RHN            | AQR                       | HepG2             | 11300              | 5042                                                | 44.6%                          |
| ENCFF651CNX            | BUD13                     | K562              | 8386               | 3738                                                | 44.6%                          |
| ENCFF917NGY            | TRA2A                     | HepG2             | 947                | 421                                                 | 44.5%                          |
| ENCFF311TOZ            | IGF2BP3                   | HepG2             | 2189               | 965                                                 | 44.1%                          |
| ENCFF264WFT            | CPSF6                     | K562              | 755                | 332                                                 | 44.0%                          |
| ENCFF929AVT            | ABCF1                     | K562              | 57                 | 25                                                  | 43.9%                          |
| ENCFF875QBF            | GEMIN5                    | K562              | 2636               | 1154                                                | 43.8%                          |
| ENCFF510KUY            | SUB1                      | HepG2             | 3405               | 1489                                                | 43.7%                          |
| ENCFF579NNP            | ZNF800                    | K562              | 2411               | 1049                                                | 43.5%                          |

| File accessions | Experiment Targets | Cell Lines | Total Peaks | Overlapping Peaks ( $P < 0.05$ ) | Overlapping Percentages |
|-----------------|--------------------|------------|-------------|----------------------------------|-------------------------|
| ENCFF985DTC     | RPS3               | HepG2      | 5861        | 2532                             | 43.2%                   |
| ENCFF284NOU     | LARP4              | K562       | 434         | 187                              | 43.1%                   |
| ENCFF034YUT     | FTO                | HepG2      | 567         | 244                              | 43.0%                   |
| ENCFF865SCT     | PRPF8              | HepG2      | 20051       | 8578                             | 42.8%                   |
| ENCFF284MRX     | PPIG               | HepG2      | 22811       | 9668                             | 42.4%                   |
| ENCFF441YAZ     | FTO                | K562       | 853         | 360                              | 42.2%                   |
| ENCFF146YIO     | GRWD1              | K562       | 4293        | 1803                             | 42.0%                   |
| ENCFF451AQL     | LIN28B             | HepG2      | 3829        | 1608                             | 42.0%                   |
| ENCFF792WPY     | DDX24              | K562       | 9615        | 4030                             | 41.9%                   |
| ENCFF885OWJ     | DDX3X              | HepG2      | 8913        | 3707                             | 41.6%                   |
| ENCFF667MXK     | DDX3X              | K562       | 6891        | 2854                             | 41.4%                   |
| ENCFF357ABQ     | FASTKD2            | K562       | 553         | 229                              | 41.4%                   |
| ENCFF322GPD     | SF3B1              | K562       | 29          | 12                               | 41.4%                   |
| ENCFF391KVJ     | UCHL5              | HepG2      | 2104        | 869                              | 41.3%                   |
| ENCFF485KCC     | PRPF4              | HepG2      | 9237        | 3790                             | 41.0%                   |
| ENCFF374PBK     | UCHL5              | K562       | 17995       | 7375                             | 41.0%                   |
| ENCFF400CFS     | RBM5               | HepG2      | 589         | 241                              | 40.9%                   |
| ENCFF534ONM     | EIF3G              | K562       | 289         | 117                              | 40.5%                   |
| ENCFF146YPF     | DDX51              | K562       | 450         | 182                              | 40.4%                   |
| ENCFF329VBT     | XRCC6              | K562       | 847         | 342                              | 40.4%                   |
| ENCFF933AGU     | RBM22              | HepG2      | 1876        | 756                              | 40.3%                   |
| ENCFF693EMF     | SMNDC1             | HepG2      | 355         | 143                              | 40.3%                   |
| ENCFF582WWR     | RBFOX2             | K562       | 3462        | 1393                             | 40.2%                   |
| ENCFF047PZR     | NOL12              | HepG2      | 266         | 107                              | 40.2%                   |
| ENCFF304YLR     | TBRG4              | HepG2      | 15          | 6                                | 40.0%                   |
| ENCFF567MGK     | YBX3               | K562       | 18356       | 7318                             | 39.9%                   |
| ENCFF119DHE     | SMNDC1             | K562       | 2517        | 1002                             | 39.8%                   |
| ENCFF387ZAH     | TIAL1              | HepG2      | 2432        | 965                              | 39.7%                   |
| ENCFF239WCW     | DGCR8              | K562       | 1238        | 490                              | 39.6%                   |
| ENCFF149CJJ     | FXR2               | HepG2      | 3935        | 1550                             | 39.4%                   |
| ENCFF101EKG     | SND1               | HepG2      | 6988        | 2750                             | 39.4%                   |
| ENCFF928OEC     | EIF3H              | HepG2      | 2908        | 1141                             | 39.2%                   |
| ENCFF242WEP     | DGCR8              | HepG2      | 1662        | 650                              | 39.1%                   |
| ENCFF890VLH     | IGF2BP1            | K562       | 5617        | 2192                             | 39.0%                   |
| ENCFF448SCQ     | HNRNPK             | K562       | 3026        | 1179                             | 39.0%                   |
| ENCFF021VWK     | U2AF1              | HepG2      | 1034        | 400                              | 38.7%                   |
| ENCFF298ZAG     | TIA1               | K562       | 5811        | 2246                             | 38.7%                   |

| File accessions    | Experiment Targets | Cell Lines  | Total Peaks | Overlapping Peaks ( $P < 0.05$ ) | Overlapping Percentages |
|--------------------|--------------------|-------------|-------------|----------------------------------|-------------------------|
| ENCFF092XHF        | NIPBL              | K562        | 316         | 121                              | 38.3%                   |
| ENCFF238REI        | DROSHA             | K562        | 3898        | 1492                             | 38.3%                   |
| ENCFF517ECT        | IGF2BP1            | HepG2       | 4443        | 1696                             | 38.2%                   |
| ENCFF151HRC        | NOLC1              | K562        | 1549        | 591                              | 38.2%                   |
| ENCFF949RPR        | PRPF8              | K562        | 10956       | 4175                             | 38.1%                   |
| ENCFF456PLF        | NCBP2              | HepG2       | 3234        | 1230                             | 38.0%                   |
| ENCFF713QGM        | GRWD1              | HepG2       | 21551       | 8122                             | 37.7%                   |
| ENCFF546ZFM        | MTPAP              | K562        | 982         | 368                              | 37.5%                   |
| <b>ENCFF955PCQ</b> | <b>HNRNPA1</b>     | <b>K562</b> | <b>166</b>  | <b>62</b>                        | <b>37.4%</b>            |
| ENCFF456SOS        | UTP18              | K562        | 134         | 50                               | 37.3%                   |
| ENCFF800XSC        | GNL3               | K562        | 27          | 10                               | 37.0%                   |
| ENCFF163SWW        | U2AF1              | K562        | 1230        | 451                              | 36.7%                   |
| ENCFF514KIW        | AATF               | K562        | 1078        | 395                              | 36.6%                   |
| ENCFF265RIO        | FASTKD2            | HepG2       | 877         | 320                              | 36.5%                   |
| ENCFF445JRX        | GTF2F1             | K562        | 4976        | 1814                             | 36.5%                   |
| ENCFF958EFT        | PHF6               | K562        | 678         | 246                              | 36.3%                   |
| ENCFF509AKB        | TBRG4              | K562        | 315         | 112                              | 35.6%                   |
| ENCFF154DRN        | RBFOX2             | HepG2       | 7337        | 2602                             | 35.5%                   |
| ENCFF538ZHY        | LSM11              | K562        | 1323        | 460                              | 34.8%                   |
| ENCFF560CDL        | PCBP2              | HepG2       | 8698        | 3022                             | 34.7%                   |
| ENCFF889CCS        | GPKOW              | K562        | 1140        | 396                              | 34.7%                   |
| ENCFF037BNT        | ZNF622             | K562        | 14936       | 5149                             | 34.5%                   |
| ENCFF039FGP        | RBM22              | K562        | 1040        | 357                              | 34.3%                   |
| ENCFF821EXR        | HNRNPUL1           | K562        | 202         | 69                               | 34.2%                   |
| ENCFF717EQF        | XRN2               | HepG2       | 1664        | 561                              | 33.7%                   |
| ENCFF938JQE        | WRN                | K562        | 119         | 40                               | 33.6%                   |
| ENCFF105PMR        | SBDS               | K562        | 9           | 3                                | 33.3%                   |
| ENCFF832JDM        | UTP3               | K562        | 18          | 6                                | 33.3%                   |
| ENCFF331AFC        | U2AF2              | K562        | 3645        | 1208                             | 33.1%                   |
| ENCFF159HMF        | HNRNPC             | K562        | 557         | 183                              | 32.9%                   |
| ENCFF923ZLX        | AKAP8L             | K562        | 2104        | 690                              | 32.8%                   |
| ENCFF741FRL        | FAM120A            | HepG2       | 8081        | 2648                             | 32.8%                   |
| ENCFF944ISN        | NOLC1              | HepG2       | 1368        | 448                              | 32.8%                   |
| ENCFF075NSB        | SRSF9              | HepG2       | 678         | 221                              | 32.6%                   |
| ENCFF241SUC        | GTF2F1             | HepG2       | 4575        | 1491                             | 32.6%                   |
| ENCFF131ZWK        | TAF15              | K562        | 561         | 180                              | 32.1%                   |
| ENCFF623DVN        | HLTF               | K562        | 138         | 44                               | 31.9%                   |

| File accessions | Experiment Targets | Cell Lines | Total Peaks | Overlapping Peaks ( $P < 0.05$ ) | Overlapping Percentages |
|-----------------|--------------------|------------|-------------|----------------------------------|-------------------------|
| ENCFF355WVE     | HNRNPUL1           | HepG2      | 468         | 149                              | 31.8%                   |
| ENCFF002FLD     | DKC1               | HepG2      | 2662        | 846                              | 31.8%                   |
| ENCFF121XLA     | HNRNPA1            | HepG2      | 89          | 28                               | 31.5%                   |
| ENCFF624RZR     | DROSHA             | HepG2      | 2105        | 662                              | 31.5%                   |
| ENCFF546EKR     | PPIL4              | K562       | 643         | 201                              | 31.3%                   |
| ENCFF777FHS     | FUS                | K562       | 4306        | 1346                             | 31.3%                   |
| ENCFF793EJK     | ZNF800             | HepG2      | 2883        | 882                              | 30.6%                   |
| ENCFF536BUW     | CSTF2T             | K562       | 10769       | 3273                             | 30.4%                   |
| ENCFF074EQM     | DDX59              | HepG2      | 3070        | 928                              | 30.2%                   |
| ENCFF485NXM     | DHX30              | K562       | 883         | 264                              | 29.9%                   |
| ENCFF844VZT     | HNRNPU             | K562       | 188         | 56                               | 29.8%                   |
| ENCFF865AZP     | SRSF7              | HepG2      | 438         | 130                              | 29.7%                   |
| ENCFF374GKD     | FKBP4              | HepG2      | 1472        | 436                              | 29.6%                   |
| ENCFF993NVI     | HNRNPK             | HepG2      | 5729        | 1687                             | 29.5%                   |
| ENCFF800GPC     | DDX21              | K562       | 75          | 22                               | 29.3%                   |
| ENCFF888SME     | DDX52              | K562       | 1274        | 361                              | 28.3%                   |
| ENCFF842EFT     | BCCIP              | HepG2      | 508         | 142                              | 28.0%                   |
| ENCFF061DTB     | NKRF               | HepG2      | 3804        | 1063                             | 27.9%                   |
| ENCFF837ZOX     | SLTM               | HepG2      | 1318        | 366                              | 27.8%                   |
| ENCFF159VOF     | U2AF2              | HepG2      | 10559       | 2928                             | 27.7%                   |
| ENCFF934PXE     | SAFB               | K562       | 506         | 140                              | 27.7%                   |
| ENCFF215XPR     | WDR3               | K562       | 29          | 8                                | 27.6%                   |
| ENCFF204UQL     | CDC40              | HepG2      | 1215        | 335                              | 27.6%                   |
| ENCFF877QKG     | TROVE2             | HepG2      | 164         | 45                               | 27.4%                   |
| ENCFF656IDO     | XRCC6              | HepG2      | 95          | 26                               | 27.4%                   |
| ENCFF955VYD     | NIP7               | HepG2      | 287         | 77                               | 26.8%                   |
| ENCFF130JJX     | EIF3D              | HepG2      | 791         | 212                              | 26.8%                   |
| ENCFF648LCX     | EIF4G2             | K562       | 4591        | 1198                             | 26.1%                   |
| ENCFF257KKQ     | DDX52              | HepG2      | 132         | 34                               | 25.8%                   |
| ENCFF075XTM     | SDAD1              | HepG2      | 860         | 221                              | 25.7%                   |
| ENCFF363FKB     | YWHAG              | K562       | 777         | 199                              | 25.6%                   |
| ENCFF259NLI     | TARDBP             | K562       | 6822        | 1741                             | 25.5%                   |
| ENCFF890NIT     | EWSR1              | K562       | 8803        | 2208                             | 25.1%                   |
| ENCFF075TIW     | YBX3               | HepG2      | 2116        | 529                              | 25.0%                   |
| ENCFF363HHT     | NONO               | K562       | 11435       | 2855                             | 25.0%                   |
| ENCFF693ZAZ     | SLTM               | K562       | 3544        | 878                              | 24.8%                   |
| ENCFF440FET     | XPO5               | HepG2      | 4777        | 1181                             | 24.7%                   |

| File accessions | Experiment Targets | Cell Lines | Total Peaks | Overlapping Peaks ( $P < 0.05$ ) | Overlapping Percentages |
|-----------------|--------------------|------------|-------------|----------------------------------|-------------------------|
| ENCFF302FFF     | LARP7              | HepG2      | 246         | 60                               | 24.4%                   |
| ENCFF469SRC     | SAFB               | HepG2      | 235         | 56                               | 23.8%                   |
| ENCFF930HHV     | BCLAF1             | HepG2      | 32607       | 7697                             | 23.6%                   |
| ENCFF514NWO     | TROVE2             | K562       | 487         | 114                              | 23.4%                   |
| ENCFF336WDV     | FUS                | HepG2      | 789         | 182                              | 23.1%                   |
| ENCFF305BNZ     | LARP7              | K562       | 260         | 59                               | 22.7%                   |
| ENCFF945YRD     | CSTF2T             | HepG2      | 20334       | 4576                             | 22.5%                   |
| ENCFF513PTZ     | TAF15              | HepG2      | 699         | 157                              | 22.5%                   |
| ENCFF553APP     | KHSRP              | HepG2      | 5280        | 1179                             | 22.3%                   |
| ENCFF937QJB     | EXOSC5             | HepG2      | 740         | 163                              | 22.0%                   |
| ENCFF788LMZ     | STAU2              | HepG2      | 774         | 168                              | 21.7%                   |
| ENCFF342PGS     | HNRNPM             | K562       | 6406        | 1372                             | 21.4%                   |
| ENCFF222ULF     | CSTF2              | HepG2      | 2903        | 597                              | 20.6%                   |
| ENCFF233ZXV     | DHX30              | HepG2      | 109         | 22                               | 20.2%                   |
| ENCFF169SMQ     | AGGF1              | K562       | 4789        | 931                              | 19.4%                   |
| ENCFF617LAH     | AGGF1              | HepG2      | 3744        | 706                              | 18.9%                   |
| ENCFF370GDB     | ILF3               | K562       | 2931        | 548                              | 18.7%                   |
| ENCFF871BYW     | KHSRP              | K562       | 22728       | 4149                             | 18.3%                   |
| ENCFF485DDA     | ILF3               | HepG2      | 3228        | 583                              | 18.1%                   |
| ENCFF105AKX     | HNRNPC             | HepG2      | 3144        | 560                              | 17.8%                   |
| ENCFF410XHF     | HLTF               | HepG2      | 3515        | 624                              | 17.8%                   |
| ENCFF924CZR     | PTBP1              | K562       | 7592        | 1341                             | 17.7%                   |
| ENCFF027CBV     | QKI                | K562       | 2247        | 389                              | 17.3%                   |
| ENCFF803GSP     | RPS11              | K562       | 24          | 4                                | 16.7%                   |
| ENCFF170SCU     | PTBP1              | HepG2      | 8595        | 1408                             | 16.4%                   |
| ENCFF296JHG     | HNRNPL             | K562       | 5683        | 906                              | 15.9%                   |
| ENCFF926QBW     | UTP18              | HepG2      | 45          | 7                                | 15.6%                   |
| ENCFF445CGF     | QKI                | HepG2      | 10367       | 1525                             | 14.7%                   |
| ENCFF046VQV     | MATR3              | K562       | 5036        | 721                              | 14.3%                   |
| ENCFF124YKO     | KHDRBS1            | K562       | 1255        | 179                              | 14.3%                   |
| ENCFF036IYW     | NSUN2              | K562       | 155         | 22                               | 14.2%                   |
| ENCFF890KEE     | HNRNPL             | HepG2      | 9010        | 1262                             | 14.0%                   |
| ENCFF456CGG     | SLBP               | K562       | 154         | 21                               | 13.6%                   |
| ENCFF878JOG     | HNRNPM             | HepG2      | 13251       | 1795                             | 13.6%                   |
| ENCFF854NXI     | HNRNPU             | HepG2      | 285         | 36                               | 12.6%                   |
| ENCFF805LKH     | SFPQ               | HepG2      | 2582        | 318                              | 12.3%                   |
| ENCFF427AAU     | EXOSC5             | K562       | 12002       | 1450                             | 12.1%                   |



| <b>File accessions</b> | <b>Experiment Targets</b> | <b>Cell Lines</b> | <b>Total Peaks</b> | <b>Overlapping Peaks (<math>P &lt; 0.05</math>)</b> | <b>Overlapping Percentages</b> |
|------------------------|---------------------------|-------------------|--------------------|-----------------------------------------------------|--------------------------------|
| ENCFF764MPF            | SUGP2                     | HepG2             | 14644              | 1588                                                | 10.8%                          |
| ENCFF193UPY            | SAFB2                     | K562              | 3699               | 396                                                 | 10.7%                          |
| ENCFF298YFY            | MATR3                     | HepG2             | 7168               | 740                                                 | 10.3%                          |
| ENCFF014MZO            | POLR2G                    | HepG2             | 51                 | 5                                                   | 9.8%                           |

**Table S2.** Summary of previously published rG4 binding proteins.

| <b>Known rG4-binding Proteins</b> | <b>Ref.</b> |
|-----------------------------------|-------------|
| DDX21                             | (3)         |
| DDX1                              | (4)         |
| DDX5                              | (5)         |
| DDX3X                             | (1)         |
| DHX9                              | (6)         |
| DHX36                             | (7)         |
| EIF4A                             | (8)         |
| EWSR1                             | (9)         |
| GRSF1                             | (10)        |
| hnRNP H/F                         | (11)        |
| hnRNPA1                           | (12)        |
| hnRNPU                            | (13)        |
| NCL                               | (14)        |
| NONO                              | (15)        |
| NSUN5                             | (1)         |
| TFAM                              | (16)        |
| YBX3                              | (17)        |
| FMR1                              | (18)        |
| FXR1                              | (19)        |
| FXR2                              | (1)         |
| CNBP                              | (20)        |
| AVEN                              | (21)        |
| SRSF1                             | (17)        |
| SF3B2                             | (22)        |
| EIF4G                             | (23)        |

**Table S3.** Oligonucleotides used in this study.

| <b>RNA G4 and mutated probes</b>             |                                               |
|----------------------------------------------|-----------------------------------------------|
| Sequence Names                               | Sequences                                     |
| PITX1 rG4                                    | 5'-TAMRA-GAGCGGGGAAGGGCGCGGGCGCGGGCGCGG-3'    |
| PITX1 rM4                                    | 5'-TAMRA-GAGCGCGGAAGCGCGCGCGCGCGCGCGG-3'      |
| NRAS rG4                                     | 5'-Cy3-GUGUGGGAGGGGCGGGUCUGGGUGCG             |
| NRAS rM4                                     | 5'-Cy3-GUGUAAAAGGGGCGGGUCUGGGUGCG             |
| PITX1 rG4                                    | 5'-Biotin-TTGAGCGGGGAAGGGCGCGGGCGCGGGCGCGG-3' |
| PITX1 rM4                                    | 5'-Biotin-TTGAGCGCGGAAGCGCGCGCGCGCGCGG-3'     |
| <b>Sequence used for CRISPR/Cas9 editing</b> |                                               |
| Sequence Names                               | Sequences                                     |
| sgRNA                                        | 5'-AAATTCCCGCCCGACCAGCA-3'                    |
| <b>Primers used for RT-qPCR</b>              |                                               |
| Sequence Names                               | Sequences                                     |
| GAPDH-F                                      | 5'-TTCGACAGTCAGCCGCATCTTCTT-3'                |
| GAPDH-R                                      | 5'-CAGGCGCCAATACGACCAAATC-3'                  |
| PITX1-F                                      | 5'-GACCCAGCCAAGAAGAAGAA-3'                    |
| PITX1-R                                      | 5'-GCCCAGTTGTTGTAGGAGTAG-3'                   |
| KHSRP-F                                      | 5'-GAATGAGTACGGATCTCGGATTG-3'                 |
| KHSRP-R                                      | 5'-CTCCCGTCTGCTGGTTTATG-3'                    |
| ACTR2-F                                      | 5'-AGCTTTGGTTGGAAGACCTATTA-3'                 |
| ACTR2-R                                      | 5'-CTGCCTGGATGGCTACATATAC3'                   |
| Firefly-F                                    | 5'-CCAGGTATCAGGCAAGGATATG-3'                  |
| Firefly-R                                    | 5'-GTTCGTCTTCGTCCCAGTAAG-3'                   |
| Renilla-F                                    | 5'-GCAGAAGTTGGTCGTGAGG-3'                     |
| Renilla-R                                    | 5'-TCATCCGTTTCCTTTGTTCTG-3'                   |

**Figure S1.** Integrative Genomics Viewer (IGV) plots showing representative comparison results of rG4-seq data with AKAP1 eCLIP-seq data (A-B) and MATR3 eCLIP-seq data (C-D).

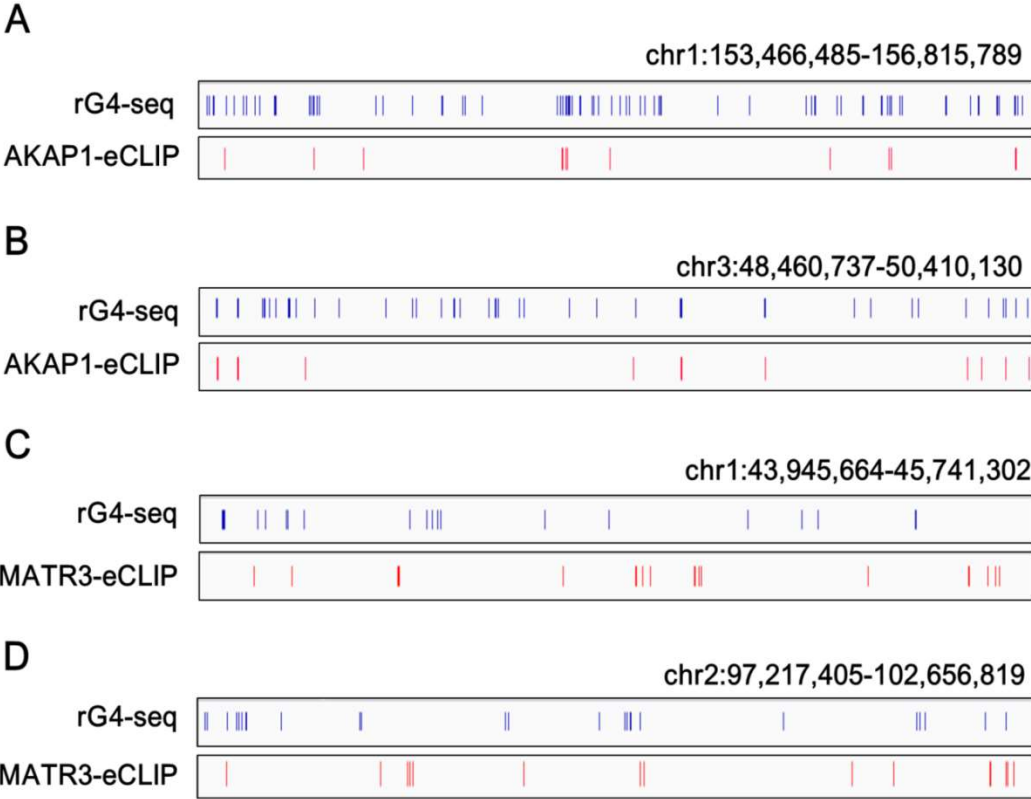

**Figure S2.** Overlap of known rG4-binding proteins between RNA-binding proteins identified in this study and previously published rG4-binding proteins.

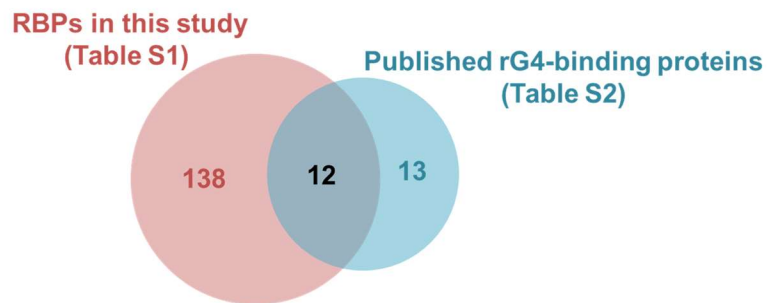

**Figure S3.** Integrative Genomics Viewer (IGV) plots showing putative G4 forming sequences in the overlapping regions between G3BP1 eCLIP-seq peaks and rG4-seq peaks. Representative overlapping regions located in the mRNAs of (A) *LRP5* and (B) *FADS2* genes.

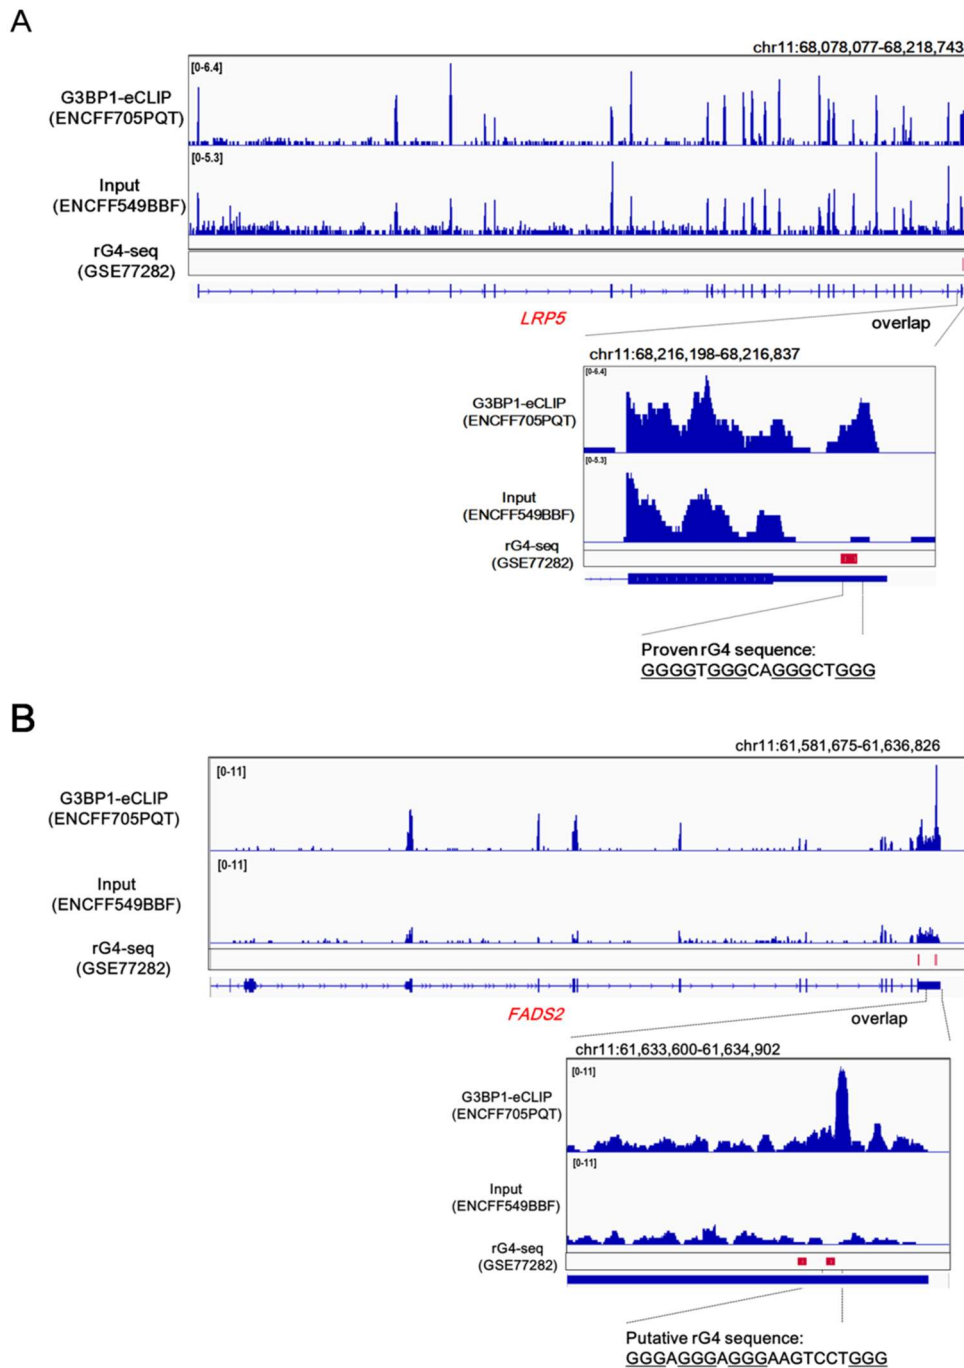

**Figure S4.** SDS-PAGE gel of GST-G3BP1 protein and its four truncated variants.

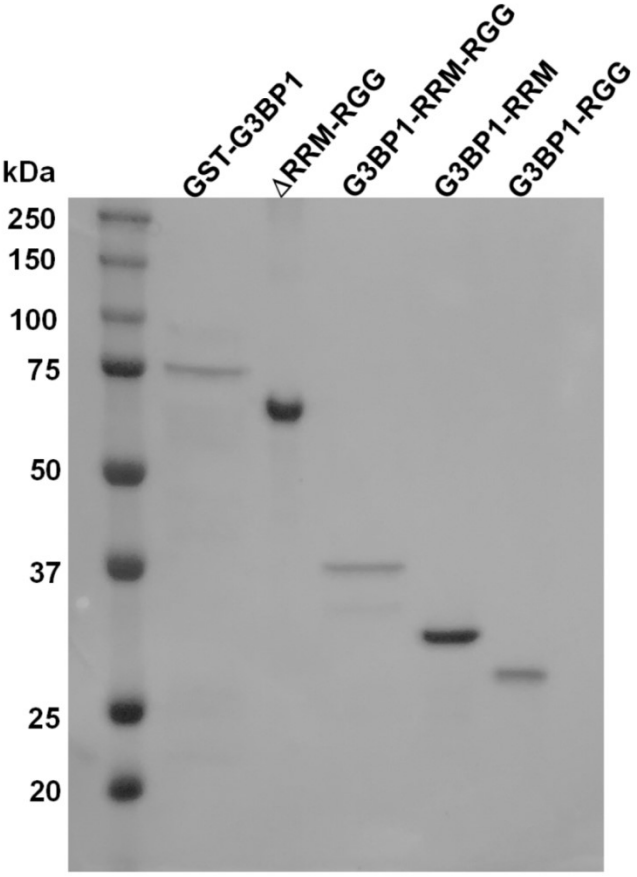

**Figure S5.** Circular dichroism (CD) spectra of PITX1 rG4 (A), NRAS rG4 (B), PITX1 rG4 in the presence of G3BP1 protein (C), and G3BP1 protein only (D). The CD spectrum of rG4 in the G3BP1-rG4 complex (C) was obtained by subtracting the CD spectrum of G3BP1 protein (D) from CD spectrum of the mixture (no shown).

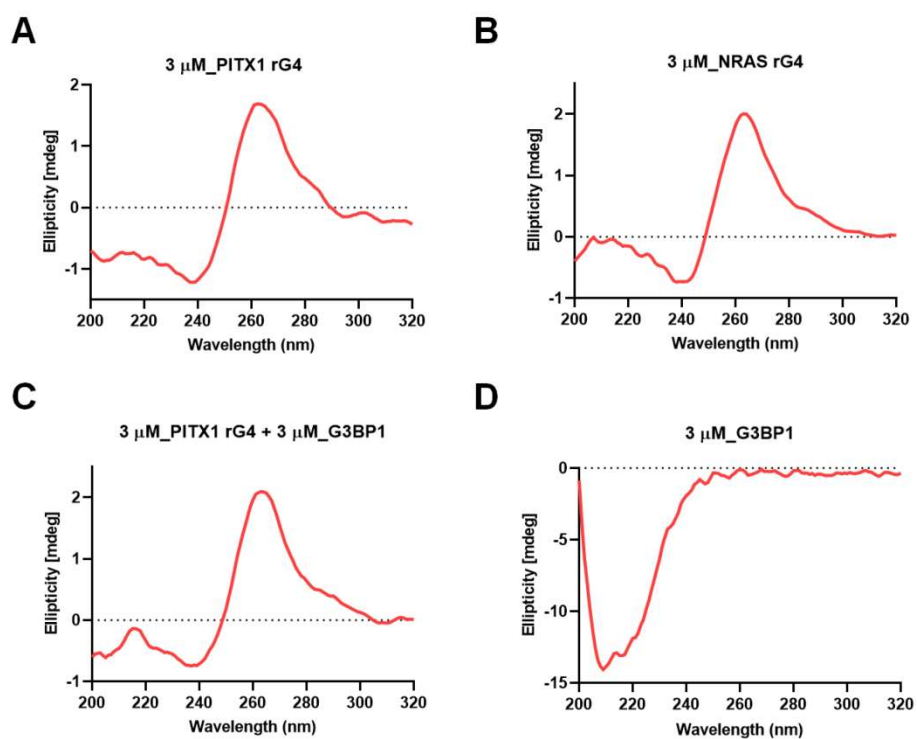



**Figure S6.** EMSA for monitoring the G3BP1-rG4 interaction with increasing concentrations of G3BP1 (A), and with a fixed concentration of G3BP1 together with increasing concentrations of PDS (B).

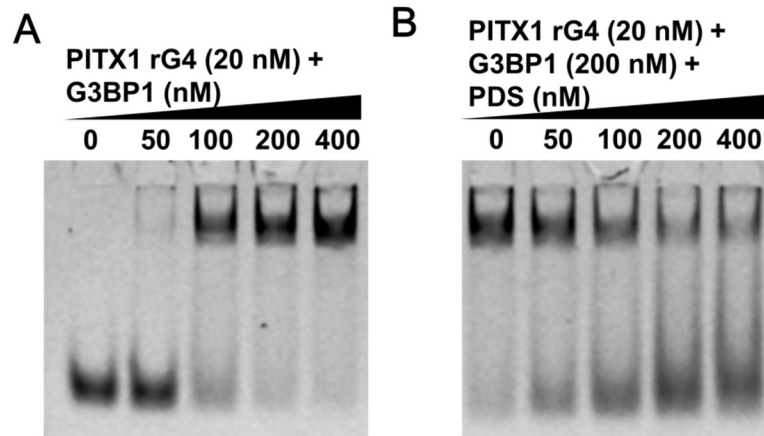

**Figure S7.** Representative Sanger sequencing results showing CRISPR-induced indel mutations of *G3BP1* gene in HEK293T cells (A) and HeLa cells (B) (i.e., *G3BP1*<sup>-/-</sup> cells).

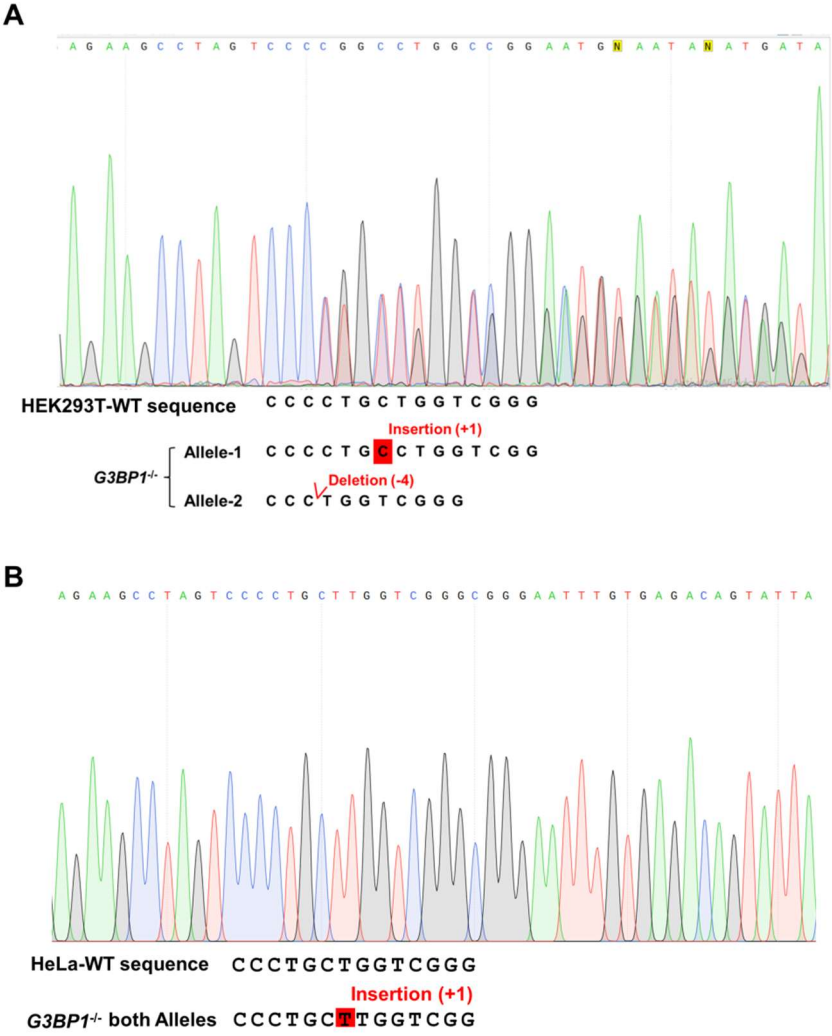

F

**Figure S8.** RT-qPCR and Western blot showing the mRNA and protein levels of Flag-PITX1 in HEK293T cells and the isogenic *G3BP1*<sup>-/-</sup> cells. (A-C) A comparison of the mRNA and protein expression levels of Flag-PITX1 in HEK293T cells transfected with Flag-PITX1-WT or Flag-PITX1-3Qm plasmid. (D-F) A comparison of the mRNA and protein expression levels of Flag-PITX1 in *G3BP1*<sup>-/-</sup> HEK293T cells transfected with Flag-PITX1-WT or Flag-PITX1-3Qm plasmid. Error bars represent S.E.M. (n = 3). The *p* values were calculated by using unpaired, two-tailed Student's *t*-test. ns, *p* > 0.05; \*\*, 0.001 ≤ *p* < 0.01; \*\*\*, *p* < 0.001.

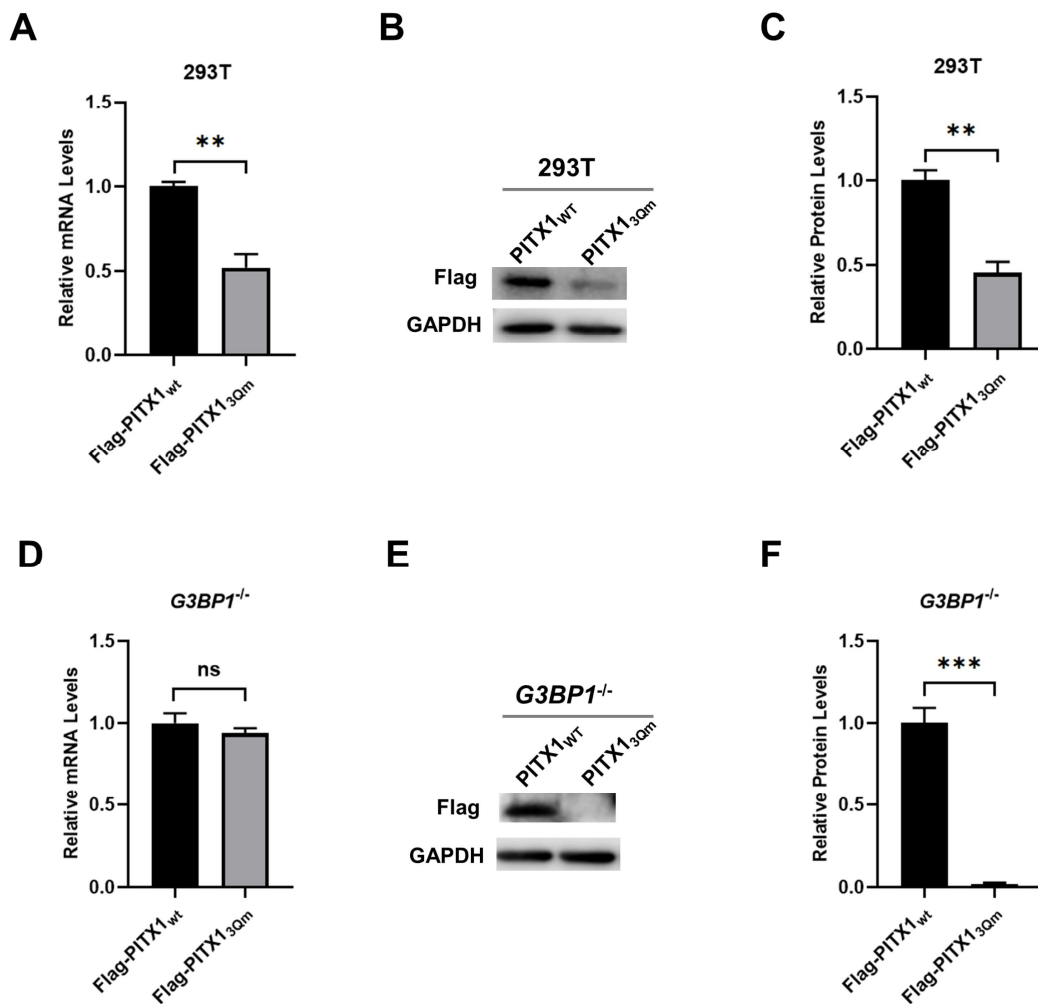

Figure S9. seCLIP-seq peaks annotation for “Ctrl” dataset (A) and “PDS” dataset (B).

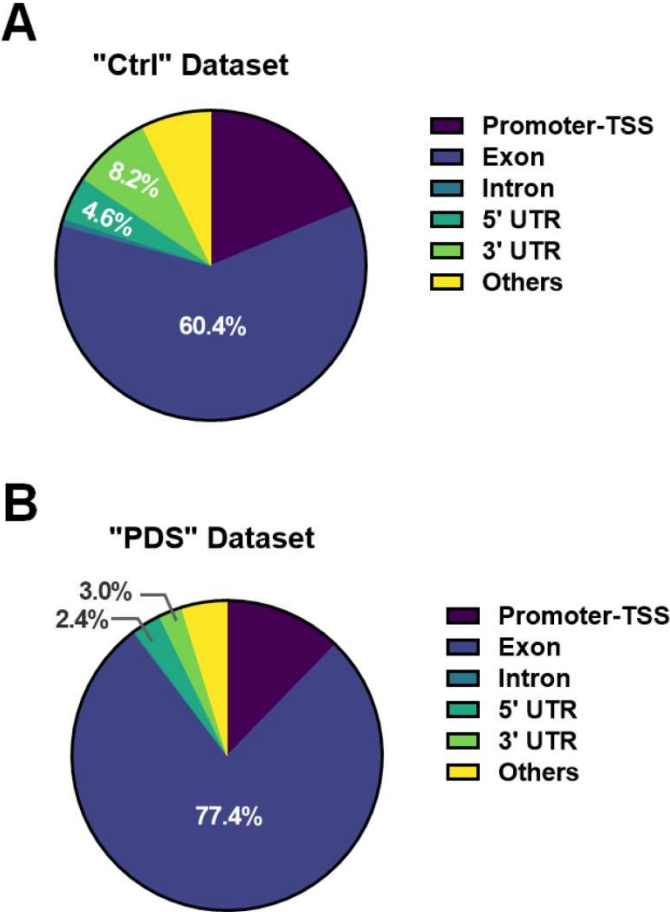

**Figure S10.** IGV plots showing the comparison of G3BP1 peaks from seCLIP-seq Replicate-1 (A) and Replicate-2 (B) around the rG4- forming sequences located in the 3'-UTR of *PITX1* gene between control (Ctrl) and PDS-treated (PDS) cells.

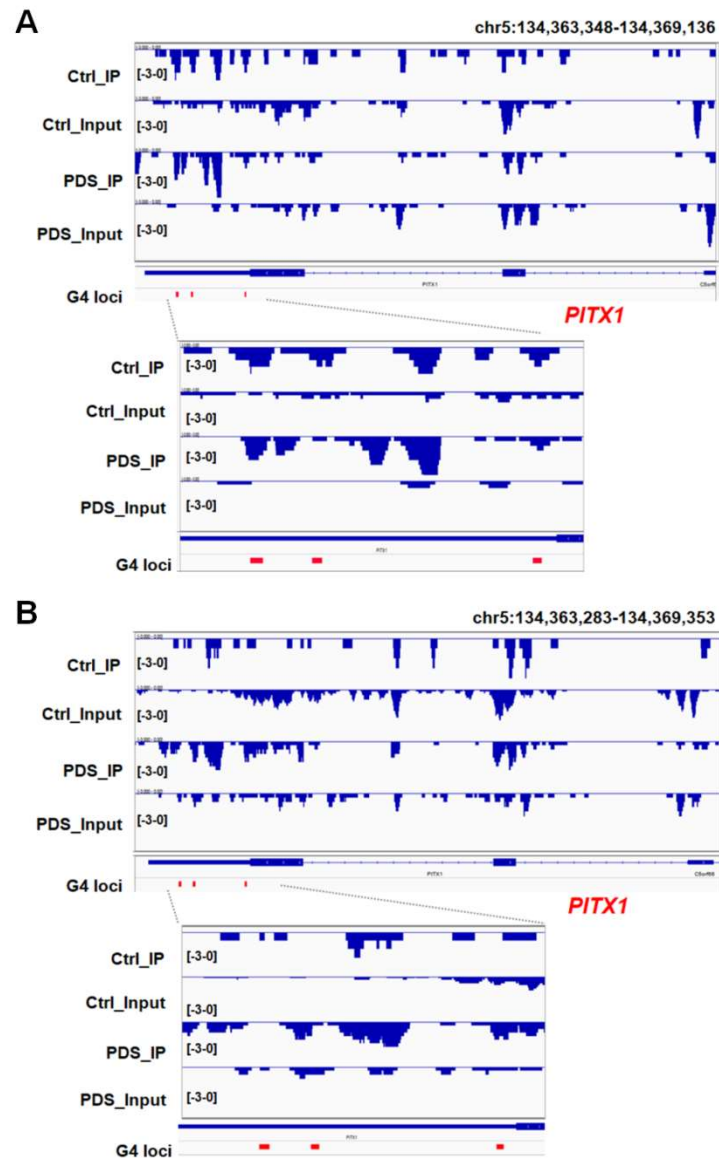

**Figure S11.** IGV plots showing the comparison between “Ctrl” and “PDS” peaks from seCLIP-seq Replicate-1 (A) and Replicate-2 (B) around the rG4-forming sequence located at 5'-UTR of *NRAS* gene.

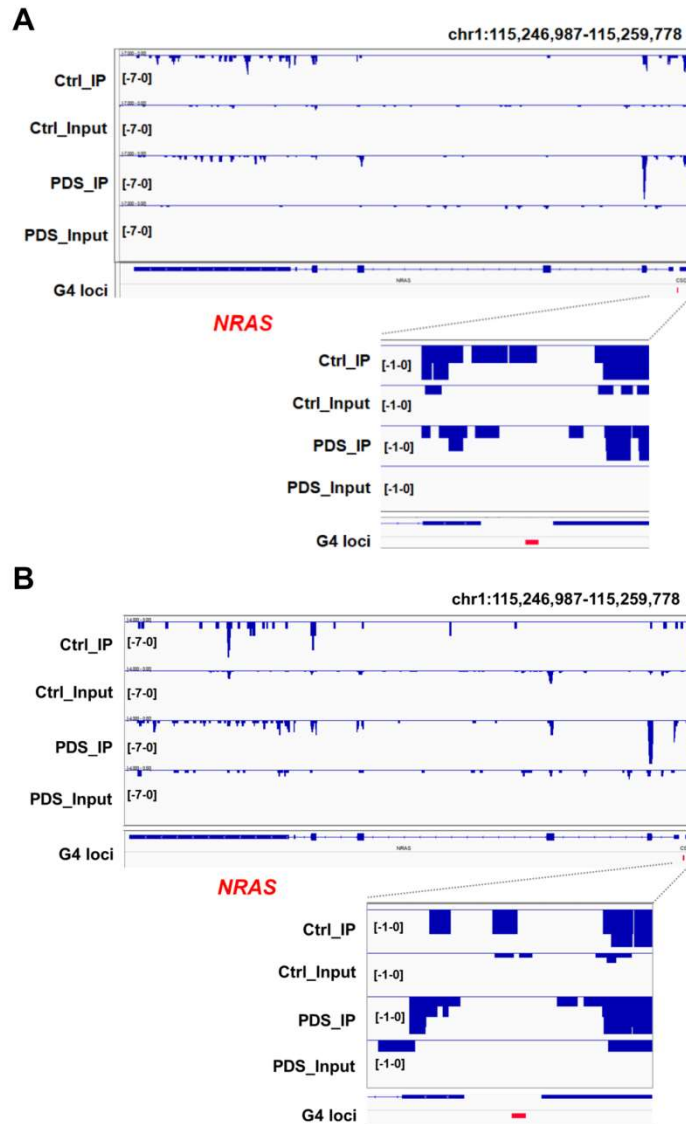

**Figure S12.** IGV plots showing the comparison between “Ctrl” and “PDS” peaks from seCLIP-seq Replicate-2 around the rG4-forming sequences located at 5'- and 3'-UTR of *KHSRP* gene.

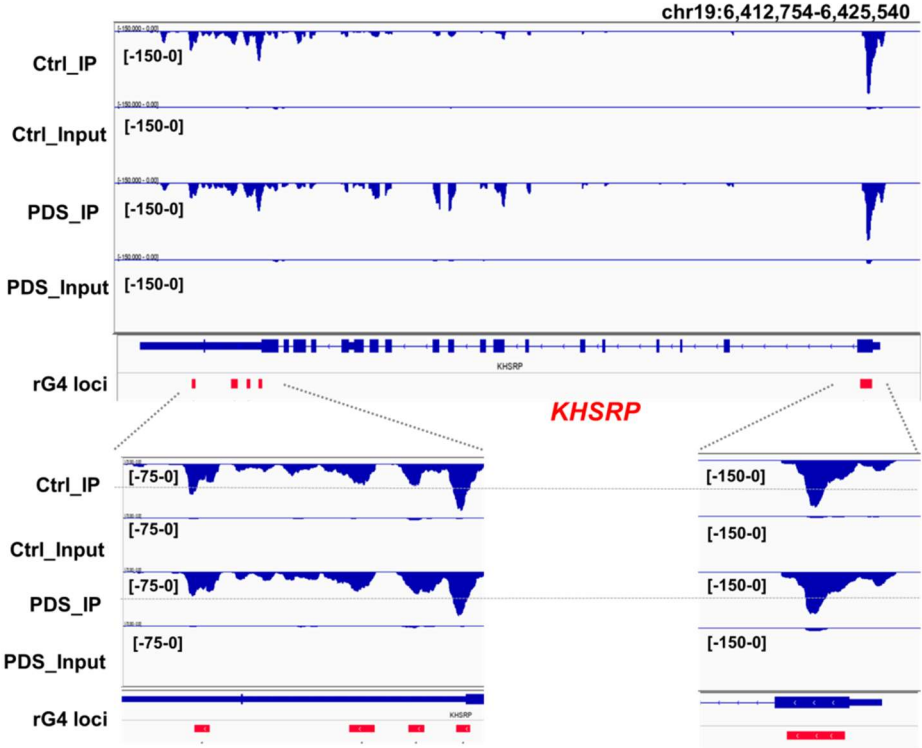

**Figure S13.** IGV plots showing the comparison between “Ctrl” and “PDS” peaks from seCLIP-seq Replicate-1 (A) and Replicate-2 (B) around the rG4-forming sequences located at 3'-UTR of *ACTR2* gene.

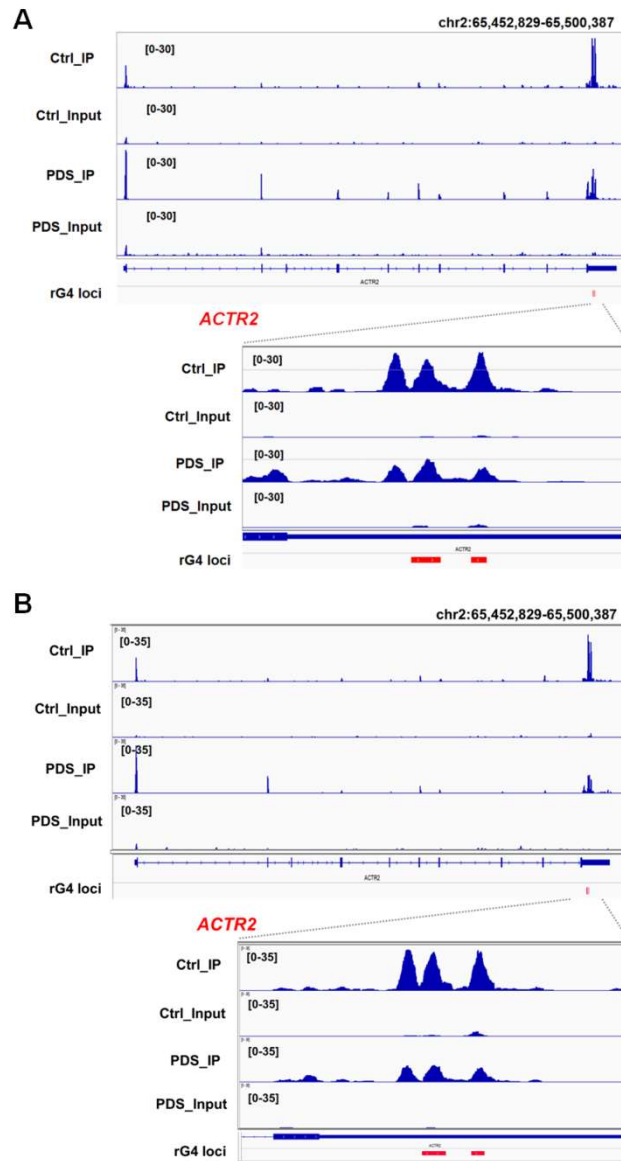



**Figure S14.** RT-qPCR results showing the half-lives of (A) KHSRP and (B) ACTR2 mRNAs in 293T cell, the isogenic *G3BP1*<sup>-/-</sup> cells, and PDS-treated 293T cells. The data represent mean ± S.E.M. (n = 3).

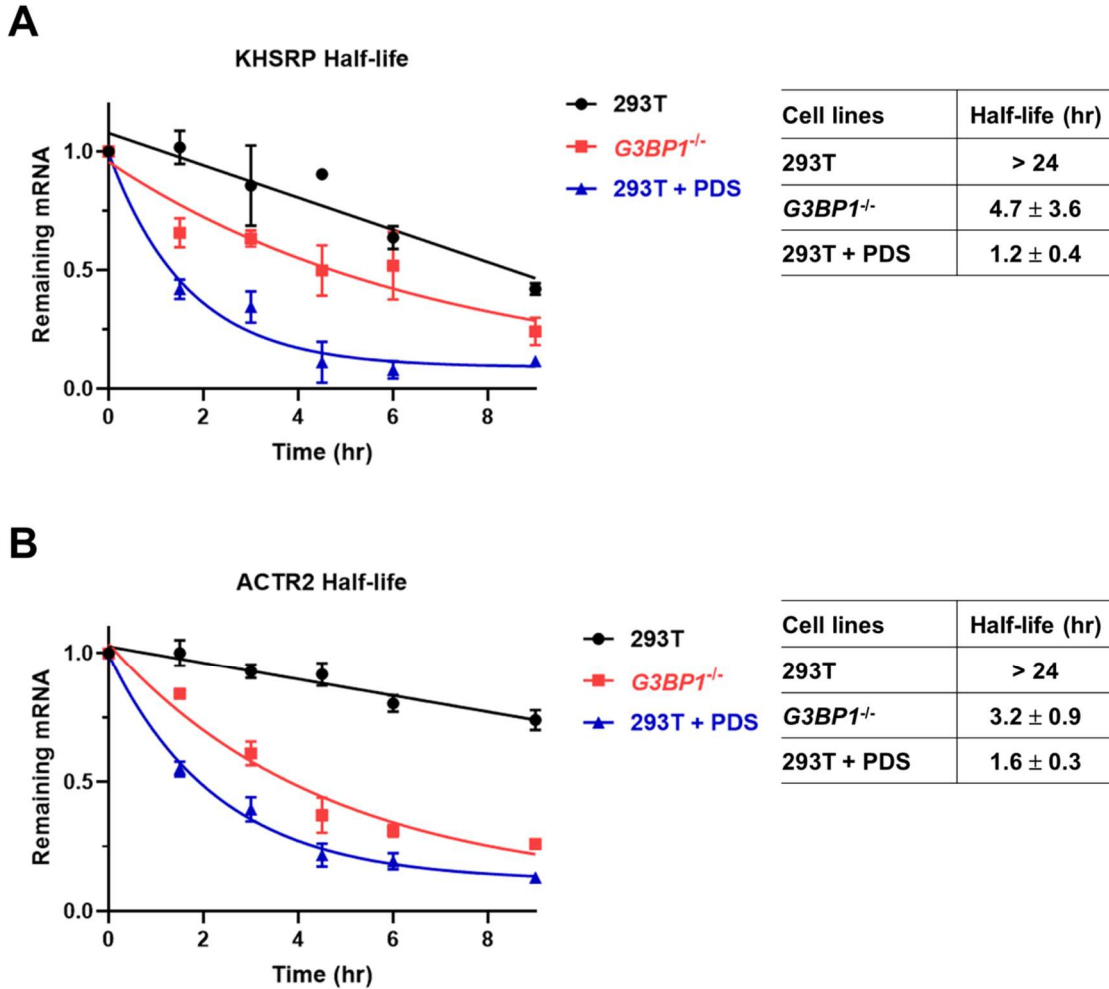

**Figure S15.** qPCR and Western blot results showing the mRNA and protein levels of *PITX1*, *KHSRP* and *ACTR2* genes in HeLa cells, G3BP1-depleted HeLa cells, HeLa cells without or with PDS treatment. (A-C) Relative mRNA and protein levels of the three genes in HeLa cells with or without PDS treatment. (D-F) Relative mRNA and protein levels of the three genes in HeLa cells and G3BP1-depleted HeLa cells. Error bars represent S.E.M. (n = 3). The *p* values were calculated by using unpaired, two-tailed Student's *t*-test. ns,  $p > 0.05$ ; \*,  $0.01 \leq p < 0.05$ ; \*\*,  $0.001 \leq p < 0.01$ ; \*\*\*,  $p < 0.001$ .

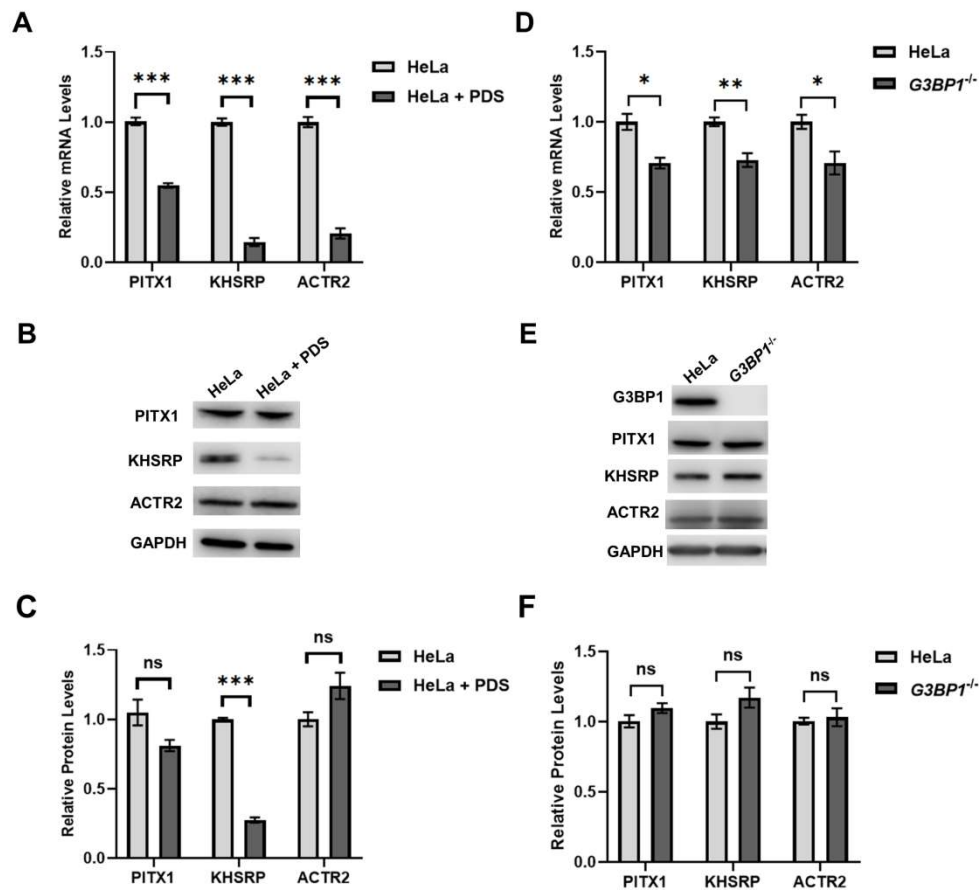

**Figure S16.** mRNA expression levels of PITX1 (A), KHSRP (B) and ACTR2 (C) in HepG2 and K562 cells. Base mean is the mean of normalized counts of replicates ( $n = 2$ ). Standard deviations between replicates are unavailable in the datasets.  $P$  values are obtained from the datasets. ns,  $p > 0.05$ ; \*,  $0.01 \leq p < 0.05$ ; \*\*\*,  $p < 0.001$ .

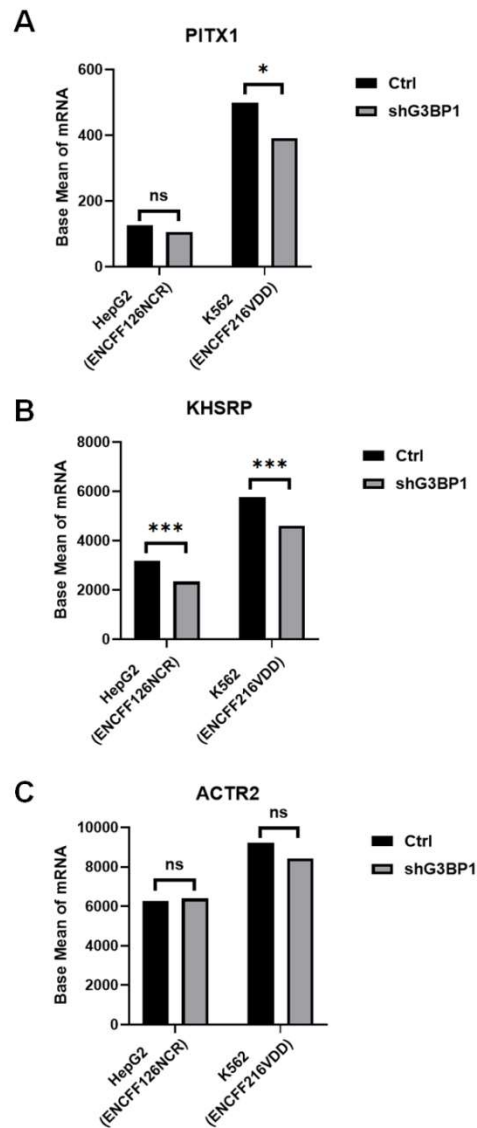

**Figure S17.** A comparison of human G3BP1, HNRNPA1 and HNRNPA2B1 proteins. (A) Schematic diagrams depicting the domain structures of the three proteins. IDR, intrinsically disordered region; RRM, RNA recognition motif; RG-rich, arginine-glycine rich. (B) Protein sequence alignment showing the sequence similarities among G3BP1 (Q13283), HNRNPA1 (P09651) and HNRNPA2B1 (P22626). Similar regions are highlighted in colors from gray to brown along with the increasing similarity.

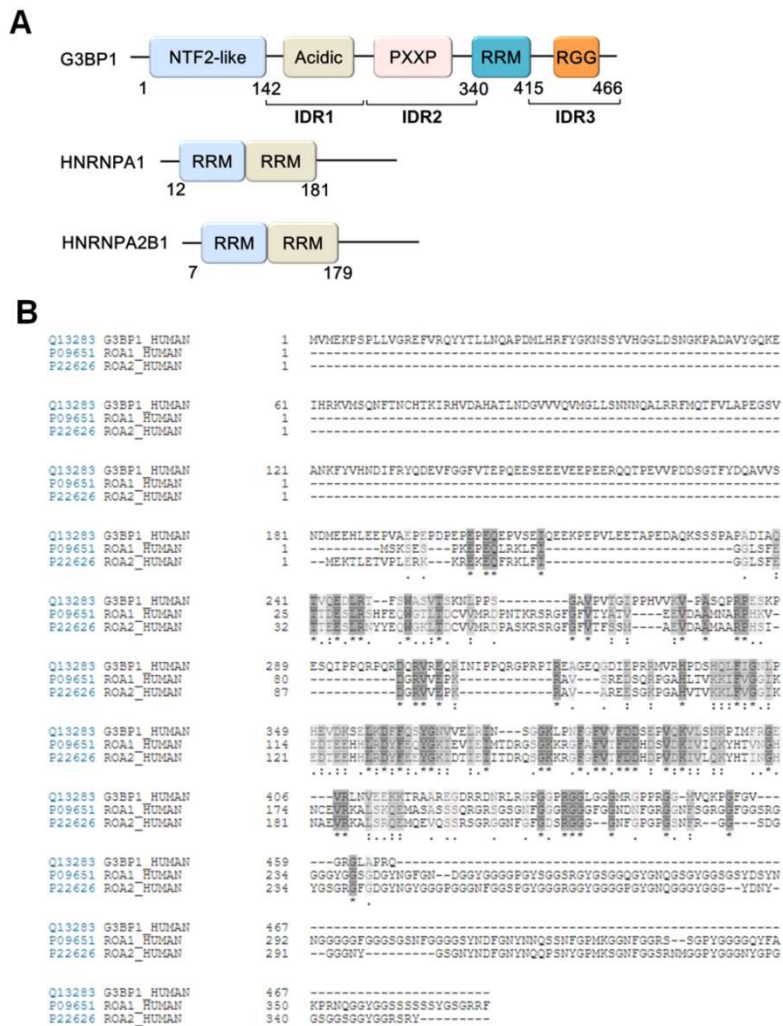

## References:

1. Herdy, B., Mayer, C., Varshney, D., Marsico, G., Murat, P., Taylor, C., D'Santos, C., Tannahill, D. and Balasubramanian, S. (2018) Analysis of NRAS RNA G-quadruplex binding proteins reveals DDX3X as a novel interactor of cellular G-quadruplex containing transcripts. *Nucleic. Acids. Res.*, **46**, 11592-11604.
2. Kwok, C.K., Marsico, G., Sahakyan, A.B., Chambers, V.S. and Balasubramanian, S. (2016) rG4-seq reveals widespread formation of G-quadruplex structures in the human transcriptome. *Nat. Methods*, **13**, 841.
3. McRae, E.K.S., Booy, E.P., Moya-Torres, A., Ezzati, P., Stetefeld, J. and McKenna, S.A. (2017) Human DDX21 binds and unwinds RNA guanine quadruplexes. *Nucleic. Acids. Res.*, **45**, 6656-6668.
4. Ribeiro de Almeida, C., Dhir, S., Dhir, A., Moghaddam, A.E., Sattentau, Q., Meinhart, A. and Proudfoot, N.J. (2018) RNA Helicase DDX1 Converts RNA G-Quadruplex Structures into R-Loops to Promote IgH Class Switch Recombination. *Mol. Cell*, **70**, 650-662.e658.
5. Wu, G., Xing, Z., Tran, E.J. and Yang, D. (2019) DDX5 helicase resolves G-quadruplex and is involved in MYC gene transcriptional activation. *Proc. Natl. Acad. Sci.*, **116**, 20453-20461.
6. Murat, P., Marsico, G., Herdy, B., Ghanbarian, A., Portella, G. and Balasubramanian, S. (2018) RNA G-quadruplexes at upstream open reading frames cause DHX36- and DHX9-dependent translation of human mRNAs. *Genome Biol.*, **19**, 229.
7. Sexton, A.N. and Collins, K. (2011) The 5' Guanosine Tracts of Human Telomerase RNA Are Recognized by the G-Quadruplex Binding Domain of the RNA Helicase DHX36 and Function To Increase RNA Accumulation. *Mol. Cell Biol.*, **31**, 736-743.
8. Wolfe, A.L., Singh, K., Zhong, Y., Drewe, P., Rajasekhar, V.K., Sanghvi, V.R., Mavrakis, K.J., Jiang, M., Roderick, J.E., Van der Meulen, J. *et al.* (2014) RNA G-quadruplexes cause eIF4A-dependent oncogene translation in cancer. *Nature*, **513**, 65.
9. Takahama, K., Kino, K., Arai, S., Kurokawa, R. and Oyoshi, T. (2011) Identification of Ewing's sarcoma protein as a G-quadruplex DNA- and RNA-binding protein. *Febs j*, **278**, 988-998.
10. Pietras, Z., Wojcik, M.A., Borowski, L.S., Szewczyk, M., Kulinski, T.M., Cysewski, D., Stepień, P.P., Dziembowski, A. and Szczesny, R.J. (2018) Dedicated surveillance mechanism controls G-quadruplex forming non-coding RNAs in human mitochondria. *Nat. Commun.*, **9**, 2558.
11. Herviou, P., Le Bras, M., Dumas, L., Hieblot, C., Gilhodes, J., Cioci, G., Hugnot, J.-P., Amedan, A., Guillonnet, F., Dassi, E. *et al.* (2020) hnRNP H/F drive RNA G-quadruplex-mediated translation linked to genomic instability and therapy resistance in glioblastoma. *Nat. Commun.*, **11**, 2661.
12. Liu, X., Ishizuka, T., Bao, H.-L., Wada, K., Takeda, Y., Iida, K., Nagasawa, K., Yang, D. and Xu, Y. (2017) Structure-Dependent Binding of hnRNP A1 to Telomere RNA. *J. Am. Chem. Soc.*, **139**, 7533-7539.
13. Serikawa, T., Spanos, C., von Hacht, A., Budisa, N., Rappsilber, J. and Kurreck, J. (2018) Comprehensive identification of proteins binding to RNA G-quadruplex motifs in the 5' UTR of tumor-associated mRNAs. *Biochimie*, **144**, 169-184.
14. Bian, W.-X., Xie, Y., Wang, X.-N., Xu, G.-H., Fu, B.-S., Li, S., Long, G., Zhou, X. and Zhang, X.-L. (2018) Binding of cellular nucleolin with the viral core RNA G-quadruplex structure suppresses HCV replication. *Nucleic. Acids. Res.*, **47**, 56-68.
15. Simko, E.A.J., Liu, H., Zhang, T., Velasquez, A., Teli, S., Haeusler, A.R. and Wang, J. (2020) G-quadruplexes offer a conserved structural motif for NONO recruitment to NEAT1 architectural lncRNA. *Nucleic. Acids. Res.*, **48**,

7421-7438.

16. Lyonnais, S., Tarrés-Solé, A., Rubio-Cosials, A., Cuppari, A., Brito, R., Jaumot, J., Gargallo, R., Vilaseca, M., Silva, C., Granzhan, A. *et al.* (2017) The human mitochondrial transcription factor A is a versatile G-quadruplex binding protein. *Sci. Rep.*, **7**, 43992.
17. von Hacht, A., Seifert, O., Menger, M., Schütze, T., Arora, A., Konthur, Z., Neubauer, P., Wagner, A., Weise, C. and Kurreck, J. (2014) Identification and characterization of RNA guanine-quadruplex binding proteins. *Nucleic Acids Res.*, **42**, 6630-6644.
18. Didiot, M.-C., Tian, Z., Schaeffer, C., Subramanian, M., Mandel, J.-L. and Moine, H. (2008) The G-quartet containing FMRP binding site in FMR1 mRNA is a potent exonic splicing enhancer. *Nucleic Acids Res.*, **36**, 4902-4912.
19. Majumder, M., House, R., Palanisamy, N., Qie, S., Day, T.A., Neskey, D., Diehl, J.A. and Palanisamy, V. (2016) RNA-Binding Protein FXR1 Regulates p21 and TERC RNA to Bypass p53-Mediated Cellular Senescence in OSCC. *PLoS genetics*, **12**, e1006306-e1006306.
20. Benhalevy, D., Gupta, S.K., Danan, C.H., Ghosal, S., Sun, H.-W., Kazemier, H.G., Paeschke, K., Hafner, M. and Juranek, S.A. (2017) The Human CCHC-type Zinc Finger Nucleic Acid-Binding Protein Binds G-Rich Elements in Target mRNA Coding Sequences and Promotes Translation. *Cell Rep.*, **18**, 2979-2990.
21. Thandapani, P., Song, J., Gandin, V., Cai, Y., Rouleau, S.G., Garant, J.M., Boisvert, F.M., Yu, Z., Perreault, J.P., Topisirovic, I. *et al.* (2015) Aven recognition of RNA G-quadruplexes regulates translation of the mixed lineage leukemia protooncogenes. *Elife*, **4**, 1-30.
22. Matsumoto, K., Okamoto, K., Okabe, S., Fujii, R., Ueda, K., Ohashi, K. and Seimiya, H. (2021) G-quadruplex-forming nucleic acids interact with splicing factor 3B subunit 2 and suppress innate immune gene expression. *Genes Cells*, **26**, 65-82.
23. Lyons, S.M., Kharel, P., Akiyama, Y., Ojha, S., Dave, D., Tsvetkov, V., Merrick, W., Ivanov, P. and Anderson, P. (2020) eIF4G has intrinsic G-quadruplex binding activity that is required for tRNA function. *Nucleic Acids Res.*, **48**, 6223-6233.
